# Supplementary material
Source: PubMed Central journal article supplement (PMC2796295)
Supplement: NIHMS123202-supplement-1-4.pdf [file NIHMS123202-supplement-1-4.pdf]

**Supplementary Table 1** Genotyping of SNPs for 44 mitotic kinase genes selected by the SNP-tagging approach

| Kinome genes    | Mitotic abnormalities              | Genotyped SNP with valid data |            |       | HapMap number (NCBI36) |     | % Coverage of HapMap (NCBI36) |     | Genotyped tagSNP density |
|-----------------|------------------------------------|-------------------------------|------------|-------|------------------------|-----|-------------------------------|-----|--------------------------|
|                 |                                    | Tagged                        | Functional | Total | SNP                    | Bin | Gene                          | Bin |                          |
| <i>AURKB</i>    | 8N peak, CYT, CN, ABN, CHR         | 5                             | 0          | 5     | 8                      | 6   | 88                            | 83  | 0.31                     |
| <i>AURKC</i>    | NA                                 | 3                             | 0          | 3     | 15                     | 5   | 60                            | 60  | 0.21                     |
| <i>BRD4</i>     | S+, aneuploidy, G2/M+, MI, CYT, PM | 5                             | 0          | 5     | 20                     | 6   | 80                            | 83  | 0.09                     |
| <i>BUB1</i>     | Aneuploidy, ABN                    | 1                             | 0          | 1     | 12                     | 1   | 100                           | 100 | 0.02                     |
| <i>BUB1B</i>    | Aneuploidy, MI, PM, ABN, CHR       | 6                             | 1          | 7     | 35                     | 6   | 100                           | 100 | 0.08                     |
| <i>CDC7</i>     | S+, G2/M+                          | 8                             | 0          | 8     | 21                     | 9   | 95                            | 89  | 0.23                     |
| <i>CDK2</i>     | G1+, size+, MI, CYT                | 6                             | 2          | 6     | 11                     | 7   | 91                            | 86  | 0.38                     |
| <i>CDK7</i>     | NA                                 | 3                             | 0          | 3     | 22                     | 5   | 82                            | 60  | 0.06                     |
| <i>CHEK1</i>    | SP, CRAD, CRLC                     | 8                             | 1          | 8     | 45                     | 12  | 87                            | 67  | 0.20                     |
| <i>CIT</i>      | 8N peak, PM, ABN                   | 13                            | 1          | 14    | 114                    | 14  | 99                            | 93  | 0.06                     |
| <i>CLK2</i>     | G1+                                | 1                             | 0          | 1     | 4                      | 1   | 100                           | 100 | 0.05                     |
| <i>CSNK2A1</i>  | G2/M+, ABN, CN, CRLC               | 6                             | 0          | 6     | 27                     | 10  | 81                            | 60  | 0.08                     |
| <i>DBF4</i>     | G1+                                | 4                             | 2a         | 6     | 8                      | 4   | 100                           | 100 | 0.09                     |
| <i>EIF2AK4</i>  | ABN, SP, CHR, CRAD                 | 4                             | 1          | 5     | 117                    | 37  | 15                            | 11  | 0.04                     |
| <i>IRAK1</i>    | CYT                                | 1a                            | 0          | 1     | 3                      | 1   | 100                           | 100 | 0.05                     |
| <i>IRAK4</i>    | CYT                                | 7                             | 1          | 7     | 29                     | 7   | 100                           | 100 | 0.18                     |
| <i>KIAA0999</i> | SP, CRAD                           | 22b                           | 1          | 23    | 158                    | 23  | 99                            | 91  | 0.08                     |
| <i>LATS1</i>    | G1+                                | 1                             | 3c         | 4     | 18                     | 1   | 100                           | 100 | 0.06                     |
| <i>LATS2</i>    | G1+                                | 14                            | 0          | 14    | 53                     | 15  | 94                            | 93  | 0.14                     |
| <i>LRRK1</i>    | PM, CN                             | 10                            | 2          | 12    | 155                    | 48  | 31                            | 21  | 0.06                     |
| <i>MAP2K3</i>   | G1+, ABN, SP                       | 5                             | 7d         | 10    | 22                     | 8   | 45                            | 63  | 0.12                     |
| <i>MAP2K4</i>   | CHR                                | 18                            | 1e         | 19    | 63                     | 18  | 100                           | 100 | 0.14                     |
| <i>MAPKAPK2</i> | SP, CRAD                           | 9                             | 1          | 10    | 39                     | 10  | 97                            | 90  | 0.15                     |
| <i>MAST2</i>    | G2/M+, CRAD                        | 10                            | 1a         | 11    | 161                    | 10  | 99                            | 90  | 0.04                     |
| <i>MASTL</i>    | NA                                 | 11                            | 3f         | 13    | 47                     | 12  | 98                            | 92  | 0.26                     |
| <i>NLK</i>      | ABN, SP, CN, CRLC                  | 10                            | 0          | 10    | 17                     | 10  | 100                           | 100 | 0.06                     |
| <i>PAK4</i>     | S+, aneuploidy, G2/M+, CRAD        | 12                            | 0          | 12    | 36                     | 8   | 94                            | 75  | 0.19                     |
| <i>PAK6</i>     | S+, aneuploidy, G2/M+, CRAD        | 17                            | 1a         | 18    | 41                     | 20  | 95                            | 90  | 0.36                     |
| <i>PAK7</i>     | S+, aneuploidy, G2/M+, CRAD        | 1a                            | 3a         | 3     | 457                    | 108 | 9                             | 3   | 0.02                     |
| <i>PKMYT1</i>   | G1+                                | 2                             | 0          | 2     | 6                      | 5   | 50                            | 40  | 0.11                     |
| <i>PLK1</i>     | G2/M+, MI, CYT, PM, ABN, SP, CN    | 5                             | 1          | 5     | 11                     | 6   | 91                            | 83  | 0.23                     |
| <i>PRKACB</i>   | ABN, SP, CHR                       | 19                            | 4          | 23    | 77                     | 20  | 94                            | 90  | 0.11                     |
| <i>PRKG2</i>    | S+, aneuploidy, MI, ABN, SP        | 10                            | 1a         | 11    | 69                     | 13  | 93                            | 69  | 0.07                     |
| <i>ROCK1</i>    | ABN, SP                            | 7                             | 1          | 7     | 34                     | 7   | 100                           | 100 | 0.04                     |
| <i>ROCK2</i>    | ABN, SP                            | 9                             | 2a         | 11    | 108                    | 10  | 66                            | 90  | 0.05                     |

|                 |                      |    |    |    |     |    |     |     |      |
|-----------------|----------------------|----|----|----|-----|----|-----|-----|------|
| <i>RYK</i>      | PM, ABN, CN, SP, CHR | 8  | 1  | 9  | 61  | 9  | 84  | 89  | 0.08 |
| <i>SCYL3</i>    | SP                   | 12 | 9g | 20 | 81  | 13 | 99  | 92  | 0.24 |
| <i>STK11</i>    | ABN, CN, SP          | 1  | 0  | 1  | 6   | 4  | 33  | 25  | 0.03 |
| <i>STK4</i>     | SP, CRLC             | 8  | 3a | 11 | 86  | 10 | 97  | 80  | 0.06 |
| <i>TTK</i>      | MI, PM, SP           | 5  | 4a | 9  | 71  | 5  | 100 | 100 | 0.10 |
| <i>WEE1</i>     | G1+                  | 6  | 0  | 6  | 12  | 7  | 92  | 86  | 0.22 |
| <i>CDC42BPA</i> | MI                   | 0  | 6  | 6  | 491 | 42 | 9   | 12  | NA   |
| <i>FYN</i>      | MI, ABN              | 0  | 9  | 9  | 210 | 45 | 39  | 18  | NA   |
| <i>MAP2K6</i>   | G1+, ABN, SP         | 0  | 6a | 6  | 125 | 41 | 16  | 7   | NA   |

NOTE: a: all perlegen SNPs; b: 2 SNPs belong to the same bin genotyped; c: 2 perlegen SNPs, 1 HapMap SNP; d: 2 perlegen, 2 HapMap and 3 Ensembl SNPs e: NIEHS SNP; f: 2 perlegen and 1 HapMap SNPs; g: 8 perlegen and 1 HapMap SNPs

Descriptions of phenotypes of mitotic abnormalities listed here were referenced from Bettencourt-Dias *et al.*, 2004

For *MAST2*, % coverage is 100% compared to NCBI35 but 90% to NCBI36 because of bin structure change. The same holds true for *PAK4*

In *PAK6*, all 18 snps genotyped account for 18 bins in NCBI36

All 19 *PRKACB* tagSNPs in NCBI35 account for 18 bins in NCBI36

All 10 *PRKG2* tagSNPs in NCBI35 account for only 9 bins in NCBI36 because of bin structure change

**Supplementary Table 2** Association of SNPs in mitotic kinase genes with breast cancer risk in pre- and post-menopausal women

| Gene Name        | rsID       | Premenopausal Women    |                           | Postmenopausal Women   |                           |
|------------------|------------|------------------------|---------------------------|------------------------|---------------------------|
|                  |            | OR (95% CI) Per Allele | <i>P</i> <sub>trend</sub> | OR (95% CI) Per Allele | <i>P</i> <sub>trend</sub> |
| <i>BRD4</i>      | rs4808278  | 1.12 (0.74-1.69)       | 0.60                      | 1.39 (1.06-1.83)       | 0.02                      |
| <i>BRD4*</i>     | rs8104223  | 1.08 (0.80-1.47)       | 0.60                      | 0.79 (0.65-0.96)       | 0.02                      |
| <i>BUB1B</i>     | rs7182070  | 0.82 (0.56-1.19)       | 0.30                      | 0.77 (0.59-0.99)       | 0.04                      |
| <i>CDC42BPA</i>  | rs2802269  | 0.52 (0.32-0.86)       | 0.01                      | 0.86 (0.64-1.15)       | 0.37                      |
| <i>CDC42BPA</i>  | rs1929860  | 1.30 (0.97-1.75)       | 0.08                      | 1.08 (0.89-1.30)       | 0.43                      |
| <i>CDK2*</i>     | rs11171710 | 1.40 (1.07-1.84)       | 0.02                      | 0.99 (0.83-1.19)       | 0.94                      |
| <i>CHEK1*</i>    | rs3731399  | 1.24 (0.84-1.84)       | 0.27                      | 0.74 (0.56-0.98)       | 0.04                      |
| <i>CIT</i>       | rs17496224 | 1.81 (1.03-3.20)       | 0.04                      | 1.43 (0.94-2.20)       | 0.10                      |
| <i>CIT*</i>      | rs4766950  | 1.01 (0.78-1.32)       | 0.93                      | 1.21 (1.01-1.45)       | 0.04                      |
| <i>DBF4</i>      | rs9655955  | 0.80 (0.48-1.32)       | 0.38                      | 0.69 (0.48-0.99)       | 0.04                      |
| <i>EIF2AK4</i>   | rs2291627  | 1.30 (0.83-2.05)       | 0.26                      | 1.25 (0.90-1.73)       | 0.18                      |
| <i>FYN</i>       | rs6914091  | 1.32 (1.00-1.74)       | 0.05                      | 1.36 (1.13-1.64)       | 0.001                     |
| <i>FYN</i>       | rs1465061  | 1.22 (0.93-1.61)       | 0.16                      | 1.41 (1.16-1.70)       | 0.0004                    |
| <i>FYN</i>       | rs12910    | 1.20 (0.91-1.57)       | 0.19                      | 1.31 (1.09-1.57)       | 0.004                     |
| <i>FYN*</i>      | rs13218316 | 0.58 (0.41-0.83)       | 0.003                     | 0.94 (0.74-1.20)       | 0.64                      |
| <i>KIAA0999</i>  | rs10047459 | 1.67 (1.13-2.45)       | 0.009                     | 1.11 (0.88-1.40)       | 0.37                      |
| <i>KIAA0999</i>  | rs1473177  | 0.77 (0.50-1.16)       | 0.21                      | 0.70 (0.52-0.94)       | 0.02                      |
| <i>KIAA0999</i>  | rs17120241 | 0.71 (0.49-1.04)       | 0.08                      | 0.72 (0.55-0.94)       | 0.02                      |
| <i>KIAA0999*</i> | rs11216164 | 0.67 (0.50-0.88)       | 0.005                     | 1.03 (0.85-1.25)       | 0.76                      |
| <i>KIAA0999*</i> | rs7120173  | 1.48 (1.07-2.04)       | 0.02                      | 1.12 (0.90-1.40)       | 0.29                      |
| <i>KIAA0999*</i> | rs10502221 | 0.74 (0.56-0.97)       | 0.03                      | 1.04 (0.87-1.24)       | 0.67                      |
| <i>KIAA0999*</i> | rs12225230 | 0.85 (0.60-1.21)       | 0.37                      | 0.78 (0.61-0.99)       | 0.04                      |
| <i>KIAA0999*</i> | rs7928320  | 0.79 (0.58-1.08)       | 0.15                      | 0.80 (0.64-0.99)       | 0.04                      |
| <i>KIAA0999*</i> | rs17120197 | 0.72 (0.51-1.02)       | 0.06                      | 0.79 (0.62-0.99)       | 0.04                      |
| <i>MAP2K4*</i>   | rs4791490  | 0.70 (0.49-0.98)       | 0.04                      | 1.22 (0.97-1.53)       | 0.09                      |
| <i>MAPKAPK2*</i> | rs17350838 | 1.00 (0.73-1.37)       | 0.99                      | 1.26 (1.01-1.57)       | 0.04                      |
| <i>MAST2*</i>    | rs4660318  | 0.71 (0.53-0.97)       | 0.03                      | 1.07 (0.87-1.31)       | 0.52                      |
| <i>MASTL*</i>    | rs12774853 | 0.68 (0.37-1.26)       | 0.22                      | 1.91 (1.28-2.85)       | 0.002                     |
| <i>MASTL*</i>    | rs2274636  | 0.67 (0.42-1.07)       | 0.09                      | 1.50 (1.07-2.11)       | 0.02                      |
| <i>MASTL*</i>    | rs11015599 | 0.83 (0.54-1.27)       | 0.40                      | 1.44 (1.06-1.96)       | 0.02                      |
| <i>PAK4*</i>     | rs7257109  | 0.74 (0.57-0.97)       | 0.03                      | 1.10 (0.92-1.32)       | 0.28                      |
| <i>PAK4*</i>     | rs2318902  | 1.46 (1.01-2.12)       | 0.05                      | 1.01 (0.80-1.27)       | 0.92                      |
| <i>PAK6</i>      | rs4924445  | 1.14 (0.87-1.51)       | 0.35                      | 1.24 (1.04-1.49)       | 0.02                      |

|               |            |                  |      |                  |        |
|---------------|------------|------------------|------|------------------|--------|
| <i>PAK6</i>   | rs7169803  | 0.92 (0.67-1.26) | 0.59 | 0.76 (0.61-0.93) | 0.009  |
| <i>PKACB</i>  | rs12728744 | 0.56 (0.30-1.06) | 0.08 | 0.76 (0.50-1.15) | 0.20   |
| <i>PKACB*</i> | rs12129768 | 1.61 (1.04-2.52) | 0.03 | 0.99 (0.74-1.32) | 0.93   |
| <i>PRKG2*</i> | rs3733553  | 1.46 (1.04-2.05) | 0.03 | 1.05 (0.86-1.28) | 0.65   |
| <i>PRKG2*</i> | rs7656323  | 1.51 (1.02-2.22) | 0.04 | 0.90 (0.72-1.13) | 0.37   |
| <i>PRKG2*</i> | rs6827939  | 1.25 (0.83-1.87) | 0.28 | 0.75 (0.57-0.97) | 0.03   |
| <i>ROCK1</i>  | rs17202375 | 0.97 (0.61-1.53) | 0.89 | 1.72 (1.25-2.37) | 0.0009 |
| <i>ROCK1*</i> | rs288989   | 0.99 (0.75-1.31) | 0.97 | 0.81 (0.68-0.97) | 0.02   |
| <i>ROCK2*</i> | rs9808232  | 1.39 (1.07-1.82) | 0.01 | 0.85 (0.71-1.02) | 0.07   |
| <i>ROCK2*</i> | rs978906   | 0.73 (0.57-0.95) | 0.02 | 1.13 (0.95-1.35) | 0.18   |
| <i>ROCK2*</i> | rs2056103  | 1.37 (1.05-1.79) | 0.02 | 0.86 (0.72-1.02) | 0.09   |
| <i>ROCK2*</i> | rs2290156  | 1.37 (1.01-1.86) | 0.05 | 0.91 (0.75-1.10) | 0.33   |
| <i>RYK</i>    | rs10935104 | 1.54 (1.03-2.31) | 0.04 | 1.26 (0.98-1.60) | 0.07   |
| <i>RYK</i>    | rs9283588  | 1.47 (0.96-2.25) | 0.08 | 1.28 (0.98-1.66) | 0.07   |
| <i>RYK</i>    | rs1131262  | 1.50 (0.98-2.31) | 0.06 | 1.24 (0.96-1.61) | 0.10   |
| <i>RYK*</i>   | rs12186098 | 2.52 (1.25-5.07) | 0.01 | 0.99 (0.65-1.49) | 0.95   |
| <i>SCYL3*</i> | rs3817859  | 0.62 (0.39-0.98) | 0.04 | 0.97 (0.72-1.32) | 0.86   |
| <i>STK4</i>   | rs17420378 | 0.84 (0.63-1.14) | 0.26 | 0.83 (0.68-1.01) | 0.06   |
| <i>STK4</i>   | rs6073636  | 0.84 (0.62-1.13) | 0.24 | 0.84 (0.69-1.02) | 0.08   |

NOTE: OR, odds ratio; CI, confidence interval.

Logistic regression analysis adjusted for age, geographical region, menopausal status, age at menarche, oral contraceptive use, age first birth, hormone replacement therapy and pack-years cigarette smoking.

\*Non-significant association in the complete case-control study population.

**Supplementary Table 3** Haplotype blocks identified in nine genes associated with breast cancer risk

| Haplotypes and Blocks   | Haplotype | Hap-Frequency | Hap-Score | P-value |
|-------------------------|-----------|---------------|-----------|---------|
| <i>BRD4</i> block 1     | 21111     | 0.164         | -1.62     | 0.10    |
|                         | 11211     | 0.200         | -1.58     | 0.11    |
|                         | 11221     | 0.104         | -0.41     | 0.68    |
|                         | 22111     | 0.179         | 0.28      | 0.78    |
|                         | 11111     | 0.238         | 1.39      | 0.16    |
|                         | 21112     | 0.115         | 2.04      | 0.04    |
| <i>BUB1B</i> block 1    | 1122      | 0.147         | -2.04     | 0.04    |
|                         | 1111      | 0.245         | -0.42     | 0.68    |
|                         | 1211      | 0.318         | 0.82      | 0.41    |
|                         | 1121      | 0.009         | 0.89      | 0.37    |
|                         | 2121      | 0.280         | 0.98      | 0.33    |
| <i>DBF4</i> block 1     | 21122     | 0.068         | -2.31     | 0.02    |
|                         | 12111     | 0.063         | -0.54     | 0.59    |
|                         | 11211     | 0.055         | 0.07      | 0.95    |
|                         | 11122     | 0.115         | 0.15      | 0.88    |
| <i>KIAA0999</i> block 1 | 11111     | 0.697         | 1.30      | 0.19    |
|                         | 11121     | 0.110         | -2.10     | 0.04    |
|                         | 12111     | 0.349         | -1.54     | 0.12    |
|                         | 21112     | 0.050         | -0.14     | 0.89    |
|                         | 11211     | 0.070         | 0.10      | 0.92    |
|                         | 11221     | 0.002         | 0.50      | 0.61    |
| <i>MAST2</i> block 1    | 11112     | 0.166         | 1.46      | 0.14    |
|                         | 11111     | 0.251         | 1.69      | 0.09    |
|                         | 12112122  | 0.066         | -2.08     | 0.04    |
|                         | 11222111  | 0.005         | -1.80     | 0.07    |
|                         | 11211111  | 0.152         | -1.20     | 0.23    |
|                         | 11111111  | 0.003         | -0.46     | 0.65    |
|                         | 12112222  | 0.098         | 0.20      | 0.84    |
| <i>MAP2K4</i> block 1   | 11221111  | 0.134         | 0.59      | 0.56    |
|                         | 21111111  | 0.260         | 0.89      | 0.38    |
|                         | 11112122  | 0.280         | 1.16      | 0.25    |
|                         | 1211112   | 0.007         | -1.80     | 0.07    |
|                         | 2211111   | 0.143         | -1.51     | 0.13    |
|                         | 1112111   | 0.100         | -1.47     | 0.14    |
|                         | 1111122   | 0.003         | -1.16     | 0.25    |
|                         | 1112122   | 0.214         | -0.63     | 0.53    |
|                         | 1111112   | 0.002         | -0.62     | 0.54    |
|                         | 1221111   | 0.108         | -0.02     | 0.99    |
| <i>ROCK1</i> block 1    | 1111212   | 0.245         | 1.06      | 0.29    |
|                         | 1211111   | 0.178         | 2.76      | 0.006   |
|                         | 1211      | 0.459         | -1.69     | 0.09    |
|                         | 1112      | 0.216         | -0.79     | 0.43    |
|                         | 2112      | 0.092         | -0.19     | 0.85    |
|                         | 1111      | 0.139         | 1.13      | 0.26    |

|                     |            |       |       |       |
|---------------------|------------|-------|-------|-------|
|                     | 1122       | 0.091 | 2.70  | 0.007 |
| <i>RYK</i> block 1  | 1111112    | 0.128 | -1.35 | 0.18  |
|                     | 1121121    | 0.002 | -1.24 | 0.21  |
|                     | 1111211    | 0.346 | -1.19 | 0.23  |
|                     | 1112111    | 0.323 | -0.63 | 0.53  |
|                     | 1111111    | 0.002 | 0.33  | 0.74  |
|                     | 1112211    | 0.002 | 0.81  | 0.42  |
|                     | 1121111    | 0.018 | 0.82  | 0.41  |
|                     | 2111211    | 0.054 | 1.68  | 0.09  |
|                     | 1221121    | 0.125 | 2.47  | 0.01  |
| <i>STK4</i> block 1 | 1122111122 | 0.139 | -2.41 | 0.02  |
|                     | 2121112221 | 0.115 | -0.57 | 0.57  |
|                     | 1122121122 | 0.157 | -0.40 | 0.69  |
|                     | 1211111111 | 0.078 | 0.48  | 0.63  |
|                     | 1121111121 | 0.003 | 0.49  | 0.63  |
|                     | 1111211111 | 0.152 | 0.68  | 0.50  |
|                     | 1111111111 | 0.283 | 0.81  | 0.42  |
|                     | 1121112221 | 0.065 | 1.43  | 0.15  |
|                     | 1111111121 | 0.004 | 1.47  | 0.14  |

---

NOTE: 1=major allele, 2=minor allele; Hap-Frequency: frequency of each haplotype in the controls; Hap-Score: statistical measurement of association of each specific haplotype with breast cancer risk

**Supplementary Table 4** Pair-wise combinations of SNPs that displayed significant associations with breast cancer risk (Chi-square  $P \leq 0.0001$ )

| SNP 1      | SNP 2      | Gene 1          | Gene 2          | OR <sub>1/0</sub> copies | OR <sub>2/0</sub> copies | OR <sub>0/1</sub> copies | OR <sub>1/1</sub> copies | OR <sub>2/1</sub> copies | OR <sub>0/2</sub> copies | OR <sub>1/2</sub> copies | OR <sub>2/2</sub> copies |
|------------|------------|-----------------|-----------------|--------------------------|--------------------------|--------------------------|--------------------------|--------------------------|--------------------------|--------------------------|--------------------------|
| rs7928320  | rs278123   | <i>KIAA0999</i> | <i>CIT</i>      | 1.00 (0.73, 1.39)        | 1.12 (0.62, 2.02)        | 1.16 (0.90, 1.49)        | 0.61 (0.43, 0.86)        | 1.72 (0.89, 3.36)        | 1.15 (0.76, 1.74)        | 0.25 (0.12, 0.53)        | 3.10 (0.62, 15.48)       |
| rs7928320  | rs17409442 | <i>KIAA0999</i> | <i>CIT</i>      | 0.98 (0.72, 1.33)        | 1.18 (0.67, 2.07)        | 1.22 (0.95, 1.56)        | 0.62 (0.44, 0.87)        | 1.87 (0.96, 3.65)        | 1.18 (0.75, 1.85)        | 0.20 (0.08, 0.49)        | 2.10 (0.38, 11.55)       |
| rs7928320  | rs175877   | <i>KIAA0999</i> | <i>CIT</i>      | 0.50 (0.38, 0.66)        | 1.27 (0.78, 2.07)        | 0.81 (0.62, 1.05)        | 0.80 (0.56, 1.15)        | 0.96 (0.42, 2.18)        | 0.40 (0.19, 0.83)        | 1.40 (0.46, 4.28)        | ( , )                    |
| rs7928320  | rs278126   | <i>KIAA0999</i> | <i>CIT</i>      | 0.94 (0.69, 1.29)        | 1.16 (0.66, 2.04)        | 1.19 (0.93, 1.53)        | 0.64 (0.46, 0.90)        | 1.92 (0.98, 3.73)        | 1.03 (0.67, 1.59)        | 0.21 (0.09, 0.48)        | 1.55 (0.26, 9.40)        |
| rs4660891  | rs6914091  | <i>MAST2</i>    | <i>FYN</i>      | 1.86 (1.29, 2.68)        | 0.60 (0.28, 1.28)        | 1.58 (1.16, 2.14)        | 1.86 (1.34, 2.58)        | 1.22 (0.64, 2.33)        | 2.20 (1.49, 3.26)        | 1.77 (1.13, 2.77)        | 3.34 (1.30, 8.56)        |
| rs7928320  | rs633      | <i>KIAA0999</i> | <i>IRAK1</i>    | 0.50 (0.38, 0.67)        | 1.30 (0.78, 2.17)        | 1.03 (0.80, 1.34)        | 1.12 (0.77, 1.62)        | 1.20 (0.56, 2.58)        | 0.84 (0.46, 1.54)        | 0.96 (0.40, 2.32)        | 3.85 (0.43, 34.54)       |
| rs7928320  | rs570278   | <i>KIAA0999</i> | <i>PAK4</i>     | 0.71 (0.56, 0.89)        | 1.22 (0.79, 1.88)        | 1.37 (0.86, 2.17)        | 0.27 (0.10, 0.74)        | ( , )                    | 1.00 ( , )               | 1.00 ( , )               | 1.00 ( , )               |
| rs7928320  | rs4427776  | <i>KIAA0999</i> | <i>LRRK1</i>    | 0.61 (0.46, 0.82)        | 1.61 (0.88, 2.96)        | 0.99 (0.77, 1.27)        | 0.68 (0.47, 0.98)        | 0.84 (0.46, 1.54)        | 0.44 (0.25, 0.75)        | 0.51 (0.23, 1.17)        | ( , )                    |
| rs10929728 | rs12915781 | <i>ROCK2</i>    | <i>LRRK1</i>    | 0.96 (0.74, 1.26)        | 0.80 (0.53, 1.20)        | 1.25 (0.92, 1.70)        | 0.97 (0.71, 1.33)        | 2.45 (1.36, 4.42)        | 0.95 (0.46, 1.96)        | 0.32 (0.15, 0.65)        | 3.95 (1.08, 14.40)       |
| rs1465061  | rs4924445  | <i>FYN</i>      | <i>PAK6</i>     | 1.50 (1.05, 2.13)        | 1.52 (0.91, 2.53)        | 1.48 (1.05, 2.09)        | 1.42 (1.01, 1.98)        | 3.55 (2.17, 5.79)        | 1.49 (0.95, 2.33)        | 2.20 (1.43, 3.39)        | 1.60 (0.82, 3.12)        |
| rs10929728 | rs2924848  | <i>ROCK2</i>    | <i>LRRK1</i>    | 0.55 (0.37, 0.82)        | 2.17 (1.18, 3.99)        | 0.98 (0.69, 1.39)        | 1.13 (0.80, 1.60)        | 1.11 (0.67, 1.84)        | 1.21 (0.80, 1.83)        | 0.83 (0.54, 1.27)        | 0.63 (0.32, 1.26)        |
| rs6914091  | rs2707736  | <i>FYN</i>      | <i>CIT</i>      | 0.99 (0.73, 1.35)        | 1.31 (0.89, 1.94)        | 0.66 (0.45, 0.95)        | 0.97 (0.71, 1.35)        | 1.37 (0.89, 2.12)        | 0.38 (0.19, 0.75)        | 1.93 (1.11, 3.33)        | 1.13 (0.51, 2.47)        |
| rs6914091  | rs2242119  | <i>FYN</i>      | <i>PAK6</i>     | 1.38 (0.96, 1.99)        | 1.34 (0.83, 2.14)        | 1.12 (0.76, 1.64)        | 1.43 (1.01, 2.01)        | 3.00 (1.91, 4.71)        | 1.26 (0.77, 2.06)        | 1.79 (1.14, 2.81)        | 0.96 (0.50, 1.84)        |
| rs12910    | rs633      | <i>FYN</i>      | <i>IRAK1</i>    | 1.80 (1.35, 2.41)        | 1.81 (1.27, 2.58)        | 2.30 (1.49, 3.55)        | 1.71 (1.22, 2.40)        | 2.12 (1.38, 3.26)        | 1.75 (0.60, 5.14)        | 0.83 (0.36, 1.89)        | 3.69 (1.62, 8.41)        |
| rs7928320  | rs9899521  | <i>KIAA0999</i> | <i>MAP2K3</i>   | 0.64 (0.48, 0.86)        | 1.34 (0.73, 2.47)        | 0.73 (0.57, 0.94)        | 0.64 (0.45, 0.91)        | 0.97 (0.51, 1.86)        | 1.40 (0.86, 2.28)        | 0.25 (0.10, 0.63)        | 2.06 (0.53, 7.95)        |
| rs1112880  | rs7928320  | <i>PRKG2</i>    | <i>KIAA0999</i> | 0.95 (0.66, 1.35)        | 4.80 (0.56, 41.4)        | 0.61 (0.47, 0.77)        | 0.96 (0.57, 1.60)        | ( , )                    | 1.58 (0.99, 2.53)        | 0.72 (0.25, 2.07)        | ( , )                    |
| rs6914091  | rs4924445  | <i>FYN</i>      | <i>PAK6</i>     | 1.57 (1.08, 2.28)        | 1.53 (0.96, 2.45)        | 1.37 (0.93, 2.02)        | 1.57 (1.10, 2.22)        | 3.12 (1.99, 4.90)        | 1.57 (0.94, 2.61)        | 2.32 (1.48, 3.64)        | 1.49 (0.79, 2.78)        |
| rs12526265 | rs616495   | <i>TTK</i>      | <i>LATS2</i>    | 1.21 (0.93, 1.58)        | 1.62 (1.05, 2.49)        | 1.91 (1.40, 2.60)        | 1.01 (0.74, 1.38)        | 1.48 (0.86, 2.57)        | 1.91 (1.04, 3.51)        | 0.88 (0.45, 1.76)        | ( , )                    |
| rs7928320  | rs2297345  | <i>KIAA0999</i> | <i>PAK7</i>     | 0.87 (0.63, 1.20)        | 1.23 (0.71, 2.13)        | 1.16 (0.90, 1.48)        | 0.70 (0.50, 0.99)        | 2.03 (0.93, 4.45)        | 1.83 (1.17, 2.88)        | 0.33 (0.15, 0.71)        | 1.61 (0.45, 5.74)        |

NOTE: q values for all the interactions shown in the table are 0.329
